# Supplementary material
Source: PubMed Central journal article supplement (PMC4815927)
Supplement: NIHMS561121-supplement-Supplement1.pdf [file NIHMS561121-supplement-Supplement1.pdf]

## Supplementary Appendix

This appendix has been provided by the authors to give readers additional information about their work.

Supplement to: Cooper CJ, Murphy TP, Cutlip DE, et al. Stenting and medical therapy for atherosclerotic renal-artery stenosis. *N Engl J Med* 2014;370:13-22. DOI: 10.1056/NEJMoa1310753

## Supplementary Appendix

### Stenting and Medical Therapy for Atherosclerotic Renal Artery Stenosis

Christopher J. Cooper, M.D., Timothy P. Murphy, M.D., Donald E. Cutlip, M.D., Kenneth Jamerson, M.D., William Henrich, M.D., Diane M. Reid, David J. Cohen, M.D., M.Sc., Alan H. Matsumoto, M.D., Michael Steffes, M.D., Michael R. Jaff, D.O., M.D., Martin R. Prince, M.D., Ph.D., Eldrin F. Lewis, M.D., Katherine R. Tuttle, M.D., Joseph I. Shapiro, M.D., M.P.H., John H. Rundback, M.D., Joseph M. Massaro, Ph.D., Ralph B. D'Agostino, Sr., Ph.D., and Lance D. Dworkin, M.D., on behalf of the CORAL Investigators

| <b>Table of Contents</b>                                                                | <b>Pages</b> |
|-----------------------------------------------------------------------------------------|--------------|
| A. CORAL Study Committees                                                               | S3-S4        |
| B. Investigators and institutions that participated in the CORAL study                  | S5-S12       |
| C. Roll-in Approval Process for Clinical Centers                                        | S13          |
| D. Inclusion Criteria                                                                   | S14          |
| E. Exclusion Criteria                                                                   | S15-S16      |
| F. Definitions for Clinical End Points                                                  | S17-S19      |
| G. Figures S1 through S6. Kaplan-Meier Curves for components of primary end point       | S20-S25      |
| H. Figure S7. Systolic blood pressure over time                                         | S26          |
| I. Table S1. Changes in Clinical End Point Definitions                                  | S27-S28      |
| J. Table S2. Reasons for non-enrollment of screened patients, reported by investigators | S29          |
| K. Table S3. Stent treatment in the stent plus medical therapy group                    | S30          |

## A. CORAL Study Committee Participants

### CORAL Steering Committee

|                                     |                                                                           |
|-------------------------------------|---------------------------------------------------------------------------|
| Lance Dworkin, MD, <i>Chair</i>     | Brown University, Rhode Island Hospital                                   |
| William Henrich, MD <i>Co-Chair</i> | University of Texas Health Science Center at San Antonio                  |
| Kenneth Jamerson, MD                | University of Michigan                                                    |
| Donald Cutlip, MD                   | Harvard Clinical Research Institute, Beth Israel Deaconess Medical Center |
| Timothy Murphy, MD                  | Brown University, Rhode Island Hospital                                   |
| Diane Reid, MD                      | National Heart, Lung and Blood Institute, NIH                             |
| Michael Steffes, MD                 | University of Minnesota                                                   |
| Michael Jaff, DO                    | Massachusetts General Hospital                                            |
| Alan Matsumoto, MD                  | University of Virginia                                                    |
| David Cohen, MD                     | Mid America Heart Institute, St Luke's Hospital                           |
| Scott Solomon, MD                   | Brigham and Women's Hospital                                              |
| Martin Prince, MD, PhD              | Weill Cornell Medical College, New York-Presbyterian Hospital             |
| Ralph D'Agostino, PhD               | Boston University, Harvard Clinical Research Institute                    |
| Katherine Tuttle, MD                | University of Washington, Providence Medical Research Center              |
| John Rundback, MD                   | Holy Name Medical Center                                                  |
| Joseph Shapiro, MD                  | <i>Marshall University</i> , Joan C. Edwards School of Medicine           |
| Christopher Cooper, MD              | University of Toledo, HSC                                                 |
| Vito Campese, MD                    | University of Southern California                                         |

### CORAL Publications Committee

|                              |                                                                           |
|------------------------------|---------------------------------------------------------------------------|
| Tim Murphy, MD, <i>Chair</i> | Brown University, Rhode Island Hospital                                   |
| Lance Dworkin, MD            | Brown University, Rhode Island Hospital                                   |
| Kenneth Jamerson, MD         | University of Michigan                                                    |
| Christopher Cooper, MD       | University of Toledo, HSC                                                 |
| William Henrich, MD          | University of Texas Health Science Center at San Antonio                  |
| Donald Cutlip, MD            | Harvard Clinical Research Institute, Beth Israel Deaconess Medical Center |
| Diane Reid, MD               | National Heart, Lung and Blood Institute, NIH                             |
| Ralph D'Agostino, PhD        | Boston University, Harvard Clinical Research Institute                    |
| John Rundback, MD            | Holy Name Medical Center                                                  |
| Alan Matsumoto, MD           | University of Virginia                                                    |

### CORAL Hypertension/Risk Factors Committee

|                                    |                                                              |
|------------------------------------|--------------------------------------------------------------|
| Katherine Tuttle, MD, <i>Chair</i> | University of Washington, Providence Medical Research Center |
| William Henrich, MD                | University of Texas Health Science Center at San Antonio     |
| Kenneth Jamerson, MD               | University of Michigan                                       |
| Barbara Greco, MD                  | Tufts University School of Medicine, Baystate Medical Center |
| John Lopez, MD                     | Loyola University Medical Center                             |
| Alexander Shepherd, MD             | University of Texas Health Science Center at San Antonio     |
| Matthew Weir, MD                   | University of Maryland Medical Center                        |

### CORAL Interventional Committee

|                                 |                                               |
|---------------------------------|-----------------------------------------------|
| John Rundback, MD, <i>Chair</i> | Holy Name Medical Center                      |
| Timothy Murphy, MD              | Brown University, Rhode Island Hospital       |
| Kenneth Rosenfield, MD          | Massachusetts General Hospital                |
| David Spinosa, MD               | Inova Fairfax                                 |
| Alan Matsumoto, MD              | University of Virginia                        |
| George Sopko, MD, MPH           | National Heart, Lung and Blood Institute, NIH |
| Robert Safian, MD               | Beaumont Hospital                             |
| Christopher Cooper, MD          | University of Toledo, HSC                     |

### **CORAL Statistics Committee**

|                                     |                                                        |
|-------------------------------------|--------------------------------------------------------|
| Ralph D'Agostino, PhD, <i>Chair</i> | Boston University, Harvard Clinical Research Institute |
| Joseph Massaro, PhD                 | Boston University, School of Public Health             |
| Marcia Testa, PhD                   | Harvard School of Public Health                        |
| Song Yang, PhD                      | National Heart, Lung and Blood Institute, NIH          |

### **CORAL Crossover Committee**

|                                |                                                                           |
|--------------------------------|---------------------------------------------------------------------------|
| Vito Campese, MD, <i>Chair</i> | University of Southern California                                         |
| Lance Dworkin, MD              | Brown University, Rhode Island Hospital                                   |
| William Henrich, MD            | University of Texas Health Science Center at San Antonio                  |
| Christopher Cooper, MD         | University of Toledo, HSC                                                 |
| Donald Cutlip, MD              | Harvard Clinical Research Institute, Beth Israel Deaconess Medical Center |

### **CORAL Conflict of Interest Committee**

|                              |                                               |
|------------------------------|-----------------------------------------------|
| Diane Reid, MD, <i>Chair</i> | National Heart, Lung and Blood Institute, NIH |
| Lance Dworkin, MD            | Brown University, Rhode Island Hospital       |
| Christopher Cooper, MD       | University of Toledo, HSC                     |
| Nancy Borders, MBA           | University of Toledo, HSC                     |

### **CORAL Enrolling Centers Committee**

|                                  |                                                                           |
|----------------------------------|---------------------------------------------------------------------------|
| Joseph Shapiro, MD, <i>Chair</i> | Marshall University, Joan C. Edwards School of Medicine                   |
| Lance Dworkin, MD                | Brown University, Rhode Island Hospital                                   |
| William Henrich, MD              | University of Texas Health Science Center at San Antonio                  |
| Christopher Cooper, MD           | University of Toledo, HSC                                                 |
| Timothy Murphy, MD               | Brown University, Rhode Island Hospital                                   |
| Donald Cutlip, MD                | Harvard Clinical Research Institute, Beth Israel Deaconess Medical Center |
| John Flack, MD                   | Wayne State University                                                    |
| Elizabeth Holper, MD             | Medical City Dallas Hospital                                              |
| Harold Szerlip, MD               | University of Arizona Medical Center                                      |
| Basil Akpunonu, MD               | University of Toledo, HSC                                                 |
| Alexander Shepherd, MD           | University of Texas Health Science Center at San Antonio                  |

### **CORAL Site Selection Committee**

|                        |                                               |
|------------------------|-----------------------------------------------|
| Kenneth Jamerson, MD   | University of Michigan                        |
| Kenneth Rosenfield, MD | Massachusetts General Hospital                |
| Timothy Murphy, MD     | Brown University, Rhode Island Hospital       |
| Diane Reid, MD         | National Heart, Lung and Blood Institute, NIH |

**B. Investigators and Institutions that participated in the CORAL trial, by descending order of enrollment.**

Site Principal Investigator is listed first.

INT PI designates Interventional Principal Investigator.

HTN PI designates Hypertensionologist Principal Investigator.

*Wellmont Holston Valley Medical Center*, Kingsport, Tennessee, INT PI: D. Christopher Metzger, MD and HTN

PI: Duc Vu, MD;

*Mayo Clinic, St. Marys Hospital*, Rochester, Minnesota, HTN PI: Stephen C. Textor, MD and INT PI: Michael

McKusick, MD;

*Asheville Cardiology Associates, PA*, Asheville, North Carolina, INT PI: William B. Abernethy, MD and HTN PI:

John A. Manley, MD;

*University of Toledo – HSC*, Toledo, Ohio, INT PI: Mark W. Burket, MD and HTN PI: Joseph I. Shapiro, MD;

*Lancaster General Hospital*, Lancaster, Pennsylvania, INT PI: John Briguglio, MD and HTN PI: Marc Weiner,

MD;

*Sacred Heart Medical Center*, Spokane, Washington, HTN PI: Katherine R. Tuttle, MD and INT PI: Rodney D.

Raabe, MD;

*University of Minnesota*, Minneapolis, Minnesota, HTN PI: Alan T. Hirsch, MD and INT PI: Yale Wang, MD;

*Rhode Island Hospital*, Providence, Rhode Island, HTN PI: Lance Dworkin, MD and INT PI: Timothy P.

Murphy, MD;

*Sunnybrook & Women’s College Health Sciences Centre*, Toronto, Canada, HTN PI: Sheldon Tobe, MD and

INT PI: Robyn Pugash, MD;

*HeartCare Midwest, S.C.*, Peoria, Illinois, INT PI: Paul J. Schmidt, MD and HTN PI: Robert T. Sparrow, MD;

*Baylor University Medical Center*, Dallas, Texas, HTN PI: Andrew Fenves, MD and INT PI: Chet Rees, MD;

*Auckland City Hospital*, Auckland, New Zealand, INT PI: Andrew Holden, MD and HTN PI: Rob Doughty, MD;

*Infinity Clinical Research*, Hollywood, Florida, INT PI: Juan Pastor, MD and HTN PI: James Reich, MD;

*CAMC Health Education and Research Institute*, Charleston, West Virginia, INT PI: Aravinda Nanjundappa,

MD and HTN PI: Asif Rahman, MD;

*University of California, San Francisco VA Medical Center*, San Francisco, California, HTN PI: Joseph H. Rapp, MD and INT PI: Rajiv Sawhney, MD;

*Piedmont Hospital*, Atlanta, Georgia, INT PI: Vivek Rajagopal, MD and HTN PI: Edward D. Frederickson, MD;

*Maine Medical Center*, Portland, Maine, HTN PI: Mark G. Parker, MD and INT PI: Peter Higgins, MD;

*Twenteborg Hospital*, Almelo, Netherlands, HTN PI: Arend Woittiez, MD and INT PI: Hans J.J. Kouwenberg, MD;

*United Regional Health Care System*, Wichita Falls, Texas, INT PI: Andre Desire, MD and HTN PI: Ashvin Patel, MD;

*Hospital Italiano de Buenos Aires*, Buenos Aires, Argentina, INT PI: Carlos Matas, MD and HTN PI: Gabriel Waisman, MD;

*Baystate Medical Center*, Springfield, Massachusetts, HTN PI: Barbara Greco, MD and INT PI: Gregory Giugliano, MD;

*Berks Cardiologists, Ltd. / St. Joseph Medical Center*, Reading, Pennsylvania, INT PI: Guy N. Piegari, MD and HTN PI: Mayank Modi, MD;

*Foothills Medical Center*, Calgary, Canada, INT PI: Ronak S. Kanani, MD and HTN PI: Nairne Scott-Douglas, MD, PhD;

*Ochsner Clinic*, New Orleans, Louisiana, INT PI: Christopher White, MD and HTN PI: Edward Frohlich, MD;

*Cardiac & Vascular Research Center of Northern Michigan*, Petoskey, Michigan, INT PI: Louis A. Cannon, MD and HTN PI: Harold J. Willens, MD;

*Presbyterian Hospital / Presbyterian Heart Group*, Albuquerque, New Mexico, INT PI: Michael Harding, MD and HTN PI: Kirby Gabrys, MD;

*University Hospital Charite*, Berlin, Germany, HTN PI: Friedrich C. Luft, MD and INT PI: Michael Gross, MD;

*Gundersen Clinic, LTD*, La Crosse, Wisconsin, HTN PI: Fadi Z. Ghandour, MD and INT PI: Lincoln H. Gundersen, MD;

*University of Texas Health Science Center at San Antonio*, San Antonio, Texas, HTN PI: Alexander Shepherd, MD, PhD and INT PI: Rajeev Suri, MD;

*North Central Heart Institute*, Sioux Falls, South Dakota, INT PI: Michael Bacharach, MD and HTN PI: Edward Zawada, MD;

*University of Cape Town / Groote Schuur Hospital*, Cape Town, South Africa, HTN PI: Brian Rayner, MD and INT PI: Mpiko Ntsekhe, MD;

*Pima Research / St. Mary's Hospital*, Tucson, Arizona, INT PI: William J. Thomas, MD and HTN PI: Amita D. Trivedi, MD;

*Doylestown Hospital*, Doylestown, Pennsylvania, INT PI: Joseph McGarvey, MD and HTN PI: Mitch Vernace, MD;

*University of Iowa HealthCare*, Iowa City, Iowa, INT PI: James D. Rossen, MD and HTN PI: William J. Lawton, MD;

*Fletcher Allen Health Care / University of Vermont*, Burlington, Vermont, INT PI: Harold Dauerman, MD and HTN PI: Richard Solomon, MD;

*LeBauer Cardiovascular / Moses Cone Hospital*, Greensboro, North Carolina, INT PI: Michael Cooper, MD and HTN PI: James Deterding, MD;

*Central Lynchburg General Hospital*, Lynchburg, Virginia, INT PI: Daniel Carey, MD and HTN PI: Lawrence Moffatt, MD ;

*Salford Royal Hospital NHS Trust*, United Manchester, United Kingdom, HTN PI: Philip A. Kalra, MD and INT PI: Nicholas Chalmers, MD;

*St. Joseph Mercy Hospital / Michigan Heart*, Ypsilanti, Michigan, INT PI: Herbert D. Aronow, MD and HTN PI: Ahmed Rehan, MD;

*St. Joseph Hospital*, Orange, California, INT PI: Mahmood K. Razavi, MD and HTN PI: Donald J. Mahon, MD;

*University of Cincinnati Medical Center*, Cincinnati, Ohio, INT PI: Mohamed A. Effat, MD and HTN PI: Ganesh Yadlapalli, MD;

*Wake Forest University / Baptist Medical Center*, Winston-Salem, North Carolina, INT PI: Matthew S. Edwards, MD and HTN PI: Pavel Levy, MD;

*Princess Alexandra Hospital*, Woolloongabba, Australia, INT PI: Kendal Redmond, MD and HTN PI: David Mudge, MD;

*University of Louisville*, Louisville, Kentucky, INT PI: Sohail Ikram, MD and HTN PI: Rosemary Ouseph, MD;  
*Scott & White Hospital*, Temple, Texas, HTN PI: Mohanram Narayanan, MD and INT PI: Timothy A. Mixon,  
MD;

*Holy Name Hospital*, Teaneck, New Jersey, INT PI: John H. Rundback, MD and HTN PI: David Levin, MD;  
*McGill University Health Centre*, Montreal, Canada, INT PI: Luc Bilodeau, MD and HTN PI: Manuel  
Dominguez, MD (note: located at Montreal Heart Institute);

*Shands Hospital at the University of Florida*, Gainesville, Florida, INT PI: R. David Anderson, MD and HTN PI:  
Karen Smith, MD;

*Mercy Gilbert Medical Center*, Chandler, Arizona, INT PI: Georges Nseir, MD and HTN PI: Bhupinder Singh,  
MD;

*Instituto de Cardiologia de Corrientes*, Corrientes, Argentina, INT PI: Jorge Baccaro, MD and HTN PI: Eduardo  
Farias, MD;

*Hospital Privado - Centro Medico de Cordoba S.A.*, Cordoba, Argentina, HTN PI: Marcos Amuchastegui, MD  
and INT PI: Miguel Ballarino, MD;

*Summa Health System Hospital*, Akron, Ohio, both INT PI and HTN PI: Joseph Pietrolungo, DO;

*University of Michigan Medical Center*, Ann Arbor, Michigan, INT PI: David Williams, MD and HTN PI: Alan  
Weder, MD;

*Hope Heart Institute*, Bellevue, Washington, INT PI: James Leggett, MD and HTN PI: Philip King, MD;

*University of Oklahoma Health Sciences Center*, Oklahoma City, Oklahoma, INT PI: Jose Exaire, MD and HTN  
PI: Lukas Haragsim, MD;

*Providence Everett Medical Center for Clinical Research*, Everett, Washington, INT PI: Michael Duong, MD  
and HTN PI: Mark E. Gunning, MD;

*Good Samaritan Regional Medical Center*, Corvallis, Oregon, INT PI: Edward Toggart, MD and HTN PI: Ohnn  
Nahm, MD;

*Southern Health*, Clayton, Australia, INT PI: James Burnes, MD and HTN PI: Peter Kerr, MD;

*Beth Israel Deaconess Medical Center*, Boston, Massachusetts, HTN PI: Mark E. Williams, MD and INT PI:  
Lawrence Garcia, MD;



*Saint Louis University*, St. Louis, Missouri, INT PI: Donald Jacobs, MD and HTN PI: Kevin Martin, MD;

*University Hospitals / Case Medical Center*, Cleveland, Ohio, INT PI: Michael Cunningham, MD and HTN PI: James Fang, MD;

*Ann Arbor VA Health System*, Ann Arbor, Michigan, INT PI: Venkataramu Krishnamurthy, MD and HTN PI: Adam Tremblay, MD;

*Washington Hospital Center*, Washington, District of Columbia, INT PI: Nelson Bernardo, MD and HTN PI: Judith H. Veis, MD;

*Vancouver Hospital*, Vancouver, Canada, INT PI: David Wood, MD and HTN PI: Adeera Levin, MD;

*University of North Carolina At Chapel Hill*, Chapel Hill, North Carolina, INT PI: George (Rick) A. Stouffer, MD and HTN PI: Alan Hinderliter, MD;

*Advocate Medical Group*, Lombard, Illinois, HTN PI: Joseph Marek, MD and INT PI: Andrew S. Blum, MD;

*University of Texas Southwestern Medical Center at Dallas*, Dallas, Texas, INT PI: Amit Khera, MD and HTN PI: Ramesh Saxena, MD, PhD;

*McGuire Research Institute*, Richmond, Virginia, INT PI: Ion Jovin, MD and HTN PI: Pramod Mohanty, MD;

*University of Virginia Health System*, Charlottesville, Virginia, INT PI: John Angle, MD and HTN PI: Carlos Ayers, MD;

*Hospital Europeen Georges-Pompidou*, Paris, France, INT PI: Marc Sapoval, MD, PhD and HTN PI: Pierre-Francois Plouin, MD;

*University of Chicago Hospitals*, Chicago, Illinois, INT PI: Sandeep Nathan, MD and HTN PI: Rupa Mehta, MD;

*University of Miami*, Miami, Florida, HTN PI: Gabriel Contreras, MD and INT PI: Eduardo deMarchena, MD;

*Bethesda North Hospital*, Cincinnati, Ohio, INT PI: Joel Reginelli, MD and HTN PI: Jennifer L. Munson, MD;

*Temple University Hospital*, Philadelphia, Pennsylvania, INT PI: Riyaz Bashir, MD and HTN PI: Jesse Goldman, MD;

*Toronto General / UHN*, Toronto, Canada, INT PI: Dheeraj Rajan, MD and HTN PI: Sheldon Tobe, MD;

*Geisinger Medical Center*, Danville, Pennsylvania, INT PI: James Elmore, MD and HTN PI: Taher Yahya, MD;

*Medical College of Georgia*, Augusta, Georgia, HTN PI: Laura Mulloy, DO and INT PI: Deepak Kapoor, MD;

*Essentia Institute of Rural Health*, Duluth, Minnesota, INT PI: Christopher Bunch, MD and HTN PI: Furqan Raja, MD;

*Dallas VA Medical Center*, Dallas, Texas, Site PI: Subhash Banerjee, MD, INT PI: Emmanouil Brilakis, MD, PhD and HTN PI: Robert Cronin, MD;

*Royal Free Hospital*, London, United Kingdom, HTN PI: Jennifer Cross, MD and INT PI: Anthony Goode, MD;

*Hospital Espanol de La Plata*, Buenos Aires, Argentina, INT PI: Jose Parmisano, MD and HTN PI: Daniel Sagastizabal, MD;

*McLaren Regional Medical Center*, Flint, Michigan, INT PI: Robert Molnar, MD and HTN PI: Ali Mohammed, MD;

*Alfred Hospital*, Melbourne, Australia, INT PI: Ken Thomson, MD and HTN PI: Solomon Menahem, MD;

*South Denver Cardiology Associates*, Littleton, Colorado, INT PI: Joseph Burchenal, MD and HTN PI: Mark Dillingham, MD;

*Stanford University Medical Center*, Palo Alto, California, INT PI: Jason Lee, MD and HTN PI: Glenn Chertow, MD;

*Wayne State University*, Detroit, Michigan, HTN PI: John Flack, MD and INT PI: Theodore L. Schreiber, MD;

*University of Florida Health Science Center Jacksonville*, Jacksonville, Florida, INT PI: Theodore Bass, MD and HTN PI: Hang Vu, MD;

*Prairie Education & Research Cooperative*, Springfield, Illinois, INT PI: Jeffrey Goldstein, MD and HTN PI: Richard E. Katholi, MD;

*University of Pennsylvania Health System*, Philadelphia, Pennsylvania, HTN PI: Michael R. Rudnick, MD and INT PI: Arthur P. Topoulus, MD;

*St. Luke's Medical Center*, Milwaukee, Wisconsin, INT PI: Robert A. Beres, MD and HTN PI: Gregory Warren, MD;

*Hypertension & Renal Research Group*, Orchard Park, New York, INT PI: Theodore S. Herman, MD and HTN PI: Arundathi Namassivaya, MD;

*Queen Elizabeth Hospital*, Birmingham, United Kingdom, HTN PI: Graham Lipkin, MD and INT PI: Ian McCafferty, MD;

*New York Mount Sinai Medical Center*, New York, New York, HTN PI: Jeffrey Olin, DO and INT PI: Robert Lookstein, MD;

*Manchester Royal Infirmary*, Manchester, United Kingdom, INT PI: James Ritchie, MD and HTN PI: Julian Wright, MD;

*Gold Coast Hospital*, Southport, Australia, INT PI: Balaji Hiremagalur, MD and HTN PI: Thomas Snow, MD;

*Royal Melbourne Hospital*, Parkville, Australia, HTN PI: Kathleen Nicholls, MD and INT PI: Richard Dowling, MD;

*Christus St. Patrick Hospital*, Lake Charles, Louisiana, INT PI: J. King White, MD and HTN PI: Abdel-Raouf AbuShamat, MD;

*The Ohio State University Medical Center*, Columbus, Ohio, INT PI: Quinn Capers, MD and HTN PI: Veronica Franco, MD;

*Greenville Hospital System*, Greenville, South Carolina, INT PI: Bruce Gray, DO and HTN PI: Thomas L. Oliver, MD;

*West LA VA Medical Center*, Los Angeles, California, INT PI: Ramin Ebrahimi, MD and HTN PI: Arnold J. Felsenfeld, MD;

*Keck Medical Center of the University of Southern California*, Los Angeles, California, INT PI: Fred A. Weaver, MD and HTN PI: Mitra K. Nadim, MD;

*New York VA Medical Center*, New York, New York, INT PI: David S. Goldfarb, MD and HTN PI: Jeffrey Lorin, MD;

*Inova Fairfax Hospital*, Falls Church, Virginia, INT PI: Alain T. Drooz, MD and HTN PI: John T. O'Brien, MD;

*Jersey Shore University Medical Center*, Neptune, New Jersey, INT PI: Pedro J. Escandon, MD and HTN PI: Indu Sharma, MD;

*Massachusetts General Hospital*, Boston, Massachusetts, INT PI: Joseph Garasic, MD and HTN PI: James L. Januzzi, MD;

*Lahey Clinic Medical Center*, Burlington, Massachusetts, HTN PI: Nicholas P. Tsapatsaris, MD and INT PI: Thomas Piemonte, MD;

*Hackensack University Medical Center*, Hackensack, New Jersey, INT PI: Joseph DeGregorio, MD and HTN PI: Thomas Salazar, MD;

*Rochester General Hospital*, Rochester, New York, INT PI: Thomas Stuver, MD and HTN PI: Marvin Grieff, MD;

*William Beaumont Hospital*, Royal Oak, Michigan, INT PI: Robert Safian, MD and HTN PI: Simon R. Dixon, MD;

*St. Clare's Hospital – Cardiology Associates of Schenectady, PC*, Schenectady, New York, INT PI: Peter D. Cospito, DO and HTN PI: William M. Vacca, MD;

*University of Wisconsin*, Madison, Wisconsin, INT PI: Giorgio Gimelli, MD and HTN PI: Karen Moncher, MD;

*Medical University of South Carolina*, Charleston, South Carolina, INT PI: John Selby, MD and HTN PI: Michael E. Ullian, MD; and

*Four Rivers Clinical Research*, Paducah, Kentucky, HTN PI: Shaukat Ali, MD and INT PI: Timothy Ranval, MD.

### **C. Roll-in Approval Process for Clinical Centers**

If potential sites met all criteria for study participation, they were required to undergo a roll-in phase before being approved for participation in the randomized trial. Initially, to complete the roll-in phase, the lead interventionalist was required to successfully conduct two consecutive cases using the Angioguard® (Cordis, Inc., Warren, NJ) distal embolic protection device and the Genesis® stent (Cordis, Inc.). After modification of the study protocol in the fourth quarter of 2006 to remove the requirement for use of a distal embolic protection device, only one roll-in subject was required to be submitted.

The roll-in images and case report forms were reviewed by the angiographic core laboratory at the University of Virginia (principal investigator: Alan Matsumoto, M.D.), and evaluated using uniform criteria for the quality of the study and the technical results. Sites that did not submit appropriate images demonstrating all renal arteries in profile, enrolled participants that had lesions inappropriate for enrollment, or that had complications related to the stent procedure such as thromboembolism, dissection, or arterial perforation were required to perform additional roll-in cases. Those who passed the review by the angiographic core laboratory were approved to enter the randomization phase of the study.

Interventional investigators were required to have performed at least 25 renal artery stent procedures, and to have board certification in interventional radiology, interventional cardiology, or vascular surgery. Each site was required to identify a separate hypertension specialist who would be responsible for medical management. Before initiation of the study at each site, the Institutional Review Board approved the protocol and informed consent documents.

There were 12 of 115 (10%) sites that applied but did not qualify for the randomized phase of the study for either performance and/or submission-related issues. Six of these were eventually approved for randomization after submitting additional data and images.

**D. Inclusion Criteria, including criteria for enrollment using magnetic resonance (MRA) or computerized tomographic angiography (CTA.)**

1. Either:

- a. Documented history of hypertension on 2 or more anti-hypertensive medications OR
- b. Renal dysfunction defined as Stage 3 or greater CKD based on the new National Kidney Foundation classifications (estimated GFR < 60 mL per minute per 1.73 m<sup>2</sup> calculated by the modified MDRD formula)

2. One or more severe renal artery stenoses by any of the following pathways:

- a. Angiographic:  $\geq 60\%$  and < 100% by renal angiogram OR
- b. Duplex: systolic velocity of >300 cm/sec OR
- c. Core lab approved Magnetic Resonance Angiography (MRA) demonstrating:

- Stenosis > 80% OR
- Stenosis > 70% with spin dephasing on 3D phase contrast MRA OR
- Stenosis > 70% and two of the following:
  - i. Ischemic kidney is > 1 cm smaller than contralateral kidney.
  - ii. Ischemic kidney enhances less on arterial phase.
  - iii. Ischemic kidney has delayed gadolinium excretion.
  - iv. Ischemic kidney hyper-concentrates the urine.
  - v. 2-D phase contrast flow waveform shows delayed systolic peak
  - vi. Post-stenotic dilatation

d. Core lab approved Computerized Tomographic Angiography (CTA) demonstrating:

- Stenosis is > 80% on high quality CTA.
- Stenosis is > 70% on CTA and there are two of the following:
  - i. The length of ischemic kidney is > 1 cm smaller than contralateral kidney.
  - ii. Reduced cortical thickness of ischemic kidney.
  - iii. Less cortical enhancement of ischemic kidney on arterial phase.
  - iv. Post-stenotic dilatation

## **E. Exclusion Criteria CORAL Trial**

- Unable to provide informed consent
- Unable or unwilling to comply with study protocol or procedures
- Age <18
- Fibromuscular dysplasia or other non-atherosclerotic renal artery stenosis known to be present prior to randomization
- Pregnancy or unknown pregnancy status in female of childbearing potential
- Participation in any drug or device trial during the study period, unless approved by the Steering Committee
- Prior enrollment in the CORAL Study
- History of stroke within 6 months, if associated with a residual neurologic deficit
- Any major surgery, major trauma, revascularization procedure, unstable angina, or myocardial infarction within 30 days prior to study entry
- Any planned major surgery or revascularization procedure, outside of the randomly allocated renal stenting dictated by this protocol, after randomization
- Hospitalization for heart failure within 30 days
- Comorbid condition causing life expectancy <3 years
- Allergic reaction to intravascular contrast, not amenable to pre-treatment
- Allergy to stainless steel
- Allergy to all of the following: aspirin, clopidogrel, ticlopidine
- Known untreated aneurysm of the abdominal aorta >5.0 cm
- Previous kidney transplant
- Stenosis of >50% of a previously treated revascularized renal artery OR Treatment of any renal artery stenosis within the past 9 months.
- Kidney size <7 cm supplied by target vessel
- Hydronephrosis, nephritis or other known cause of renal insufficiency, not due to large vessel renal artery stenosis
- Visualized stenosis of only an accessory renal artery supplying <1/2 of the ipsilateral renal parenchyma, without stenosis in a dominant renal artery
- Local lab serum Cr >4.0 mg/dl on the day of randomization
- Presence of a renal artery stenosis not amenable for treatment with a stent, known to be present prior to randomization
- The index lesion cannot be treated with a single stent (i.e. >18 mm in length)
- The placement of a stent will necessitate covering a renal artery branch renal artery with the stent
- The stenosis is in an artery <3.5 mm in diameter

- The stenosis involves a segmental renal artery branch
- Abrupt vessel closure or dissection after diagnostic angiography [NOTE: Patients with abrupt vessel closure or dissection as a result of diagnostic angiography will not be randomized but will undergo stent revascularization, receive optimal medical therapy and will be followed for the full study period.]



## **F. End Point Definitions for the CORAL Trial**

### DEATH CLASSIFICATION

Death was classified in the following categories:

#### I. CARDIOVASCULAR DEATH

##### A. Fatal Myocardial Infarction

Death occurring within 14 days after a documented myocardial infarction in which there is no conclusive evidence to another cause of death or autopsy evidence of a recent infarct or abrupt death with either ECG changes indicative of an acute injury, abnormal markers without evolutionary changes, or new wall motion abnormality

##### B. Pump Failure

Death occurring within the context of clinically worsening symptoms and/or signs of heart failure without evidence of another cause of death.

##### C. Sudden Death

Death that occurred unexpectedly in an otherwise stable patient and last seen up to 24 hours.

##### D. Presumed Sudden Death

Death that occurred unexpectedly in an otherwise stable patient in which the patient was last seen >24 hours before death and circumstances are suggestive of sudden death.

##### E. Presumed Cardiovascular Death

Death occurring when the patient was last seen >24 hours before death and presumed cardiovascular death.

##### F. Stroke

Death occurring after a documented stroke.

##### G. Pulmonary Embolism

Death occurring after and as a result of a pulmonary embolism.

##### H. Cardiovascular Procedure-Related

Death occurring during a cardiovascular procedure (CABG, PTCA, other) or as a result of later complications related to the procedure within 15 days.

##### I. Other Cardiovascular

Death must be due to a fully documented other cardiovascular cause not included above.

#### II. RENAL

Death due to a renal cause in the setting of:

1. Patient refusal to initiate dialysis (i.e. died of complications of uremia)
2. Treatment of acute renal failure
3. Direct complication of dialysis or other renal procedure (i.e. retransplantation, renal biopsy)
4. Hyperkalemia in association with renal insufficiency
5. Fatal reaction to renally excreted or metabolized medication in association with renal insufficiency
6. Other complications from renal failure

#### III. NON-CARDIOVASCULAR (Non-Renal)

If an unequivocal and documented non-cardiovascular cause can be established as the primary cause of death, the event will be classified as non-cardiovascular. Non-cardiovascular deaths will be further classified into the following categories:

Infection, Malignancy, Pulmonary, Gastrointestinal, Accidental, Suicide, Diabetes, and other.

#### IV. UNKNOWN

For cases of death for which there is insufficient data available to determine if the cause was cardiovascular, renal or non-cardiovascular, the event will be classified as unknown.

#### NON-FATAL ENDPOINT DEFINITIONS

##### A. Myocardial Infarction

1. Positive cardiac markers (troponin >ULN or CKMB  $\geq$  2xULN AND either ECG changes or clinical presentation,

OR

2. Silent MI: New pathologic Q waves in two or more contiguous leads AND in the absence of corresponding symptoms.

##### B. Hospitalization for Congestive Heart Failure

Unplanned presentation for new or worsening heart failure that requires a change in a hospitalization calendar day, and requiring IV therapy with either vasodilators, or diuretics, or inotropes and at least one of the following:

a) Increasing dyspnea on exertion

b) Orthopnea

c) Paroxysmal nocturnal dyspnea

d) Increasing peripheral edema

e) Increasing fatigue, decreasing exercise tolerance

f) Renal hypoperfusion (i.e. worsening renal function)

g) Pulmonary edema

h) Elevated jugular venous pressure

i) Radiological sign of CHF

##### C. Stroke

1. A focal neurological deficit of central origin lasting more than 24 hours, with or without imaging confirmation of cerebral infarction or intracerebral hemorrhage.

OR

2. A focal neurological deficit of central origin lasting less than 24 hours with corresponding imaging evidence of cerebral infarction or intracerebral hemorrhage.

OR

3. A focal neurological deficit of central origin lasting less than 24 hours that was treated with thrombolytic therapy or directed percutaneous intervention.

OR

4. A non-focal encephalopathy lasting more than 24 hours with imaging evidence of cerebral infarction or hemorrhage adequate to account for the clinical state. Strokes were further sub-classified as Ischemic Stroke, Ischemic Stroke with Hemorrhagic Conversion, Primary Intracranial Hemorrhage, or Unknown when imaging is unavailable or inconclusive.

D. Progressive Renal Insufficiency

A 30% reduction in estimated glomerular filtration rate using the Modified Diet in Renal Disease formula as determined by the Biochemistry Core lab or local lab creatinine samples on two determinations separated by  $\geq 60$  days and in the absence of an explanation for progressive renal failure other than ischemic nephropathy.

E. Renal Replacement Therapy (RRT)

At least one of the following must occur in order to meet the criteria for this event:

a. Renal transplant

OR

b. Hemodialysis or peritoneal dialysis for  $\geq 30$  days

OR

c. Physician recommended RT and patient refused

OR

d. Patient died within 30 days after the initiation of dialysis for chronic renal failure

### G. Kaplan-Meier Curves for components of primary endpoint.

Figure S1. Survival Free from Cardiovascular or Renal death through 5 years of follow-up

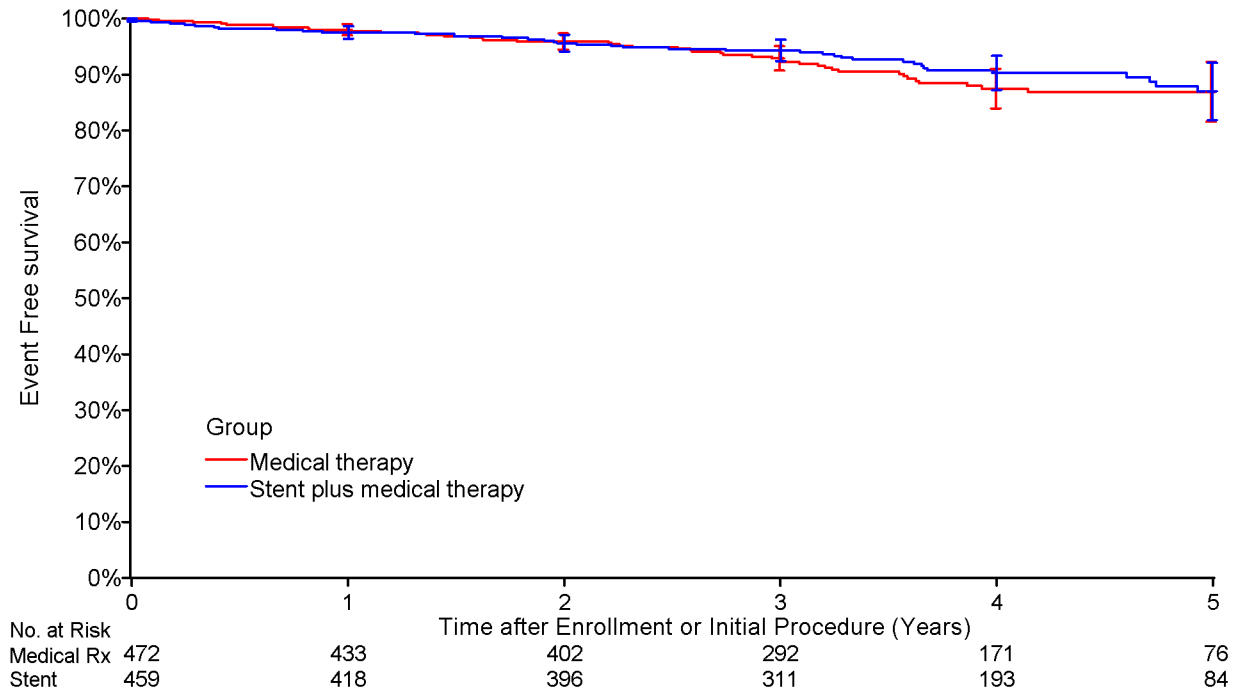

Figure S2. Survival Free from Stroke through 5 years of follow-up

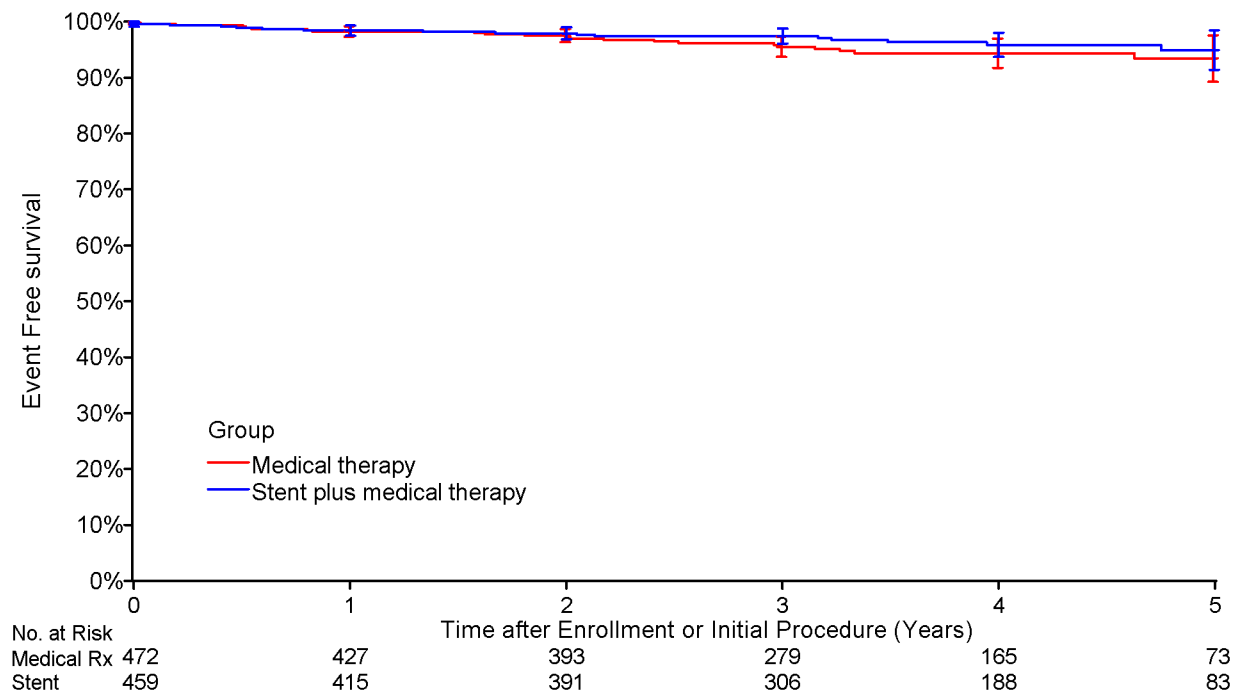

Figure S3. Survival Free from Myocardial Infarction through 5 years of follow-up

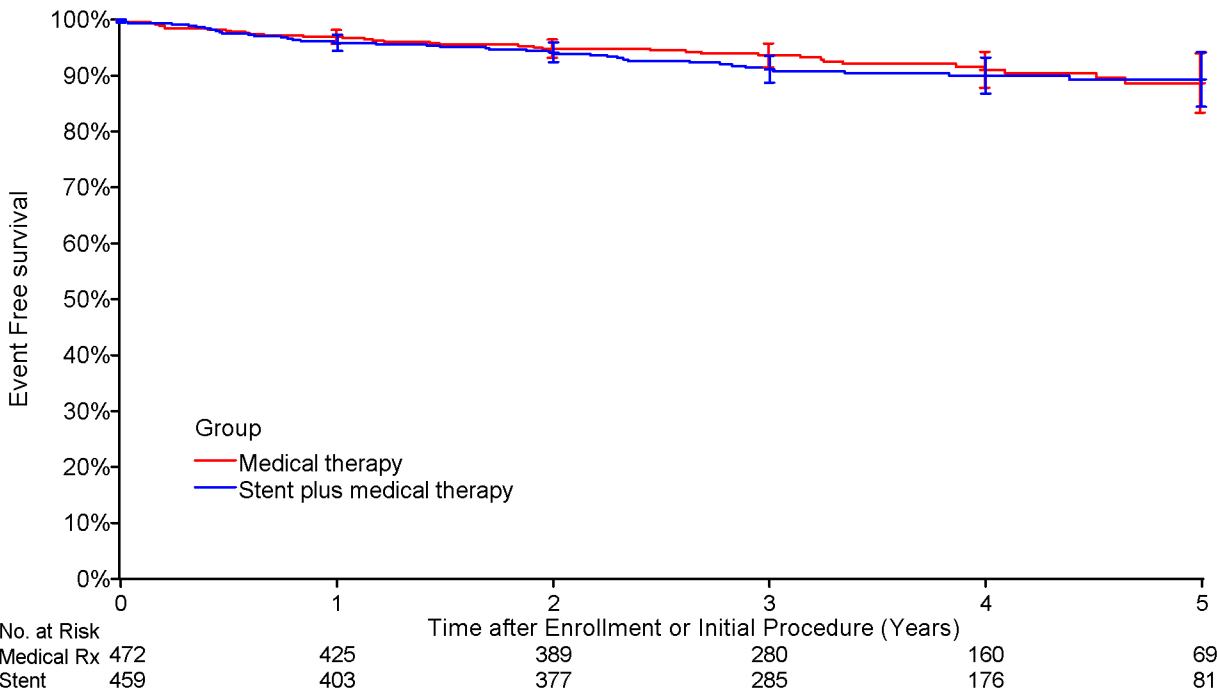

Figure S4. Survival Free from Heart Failure through 5 years of follow-up

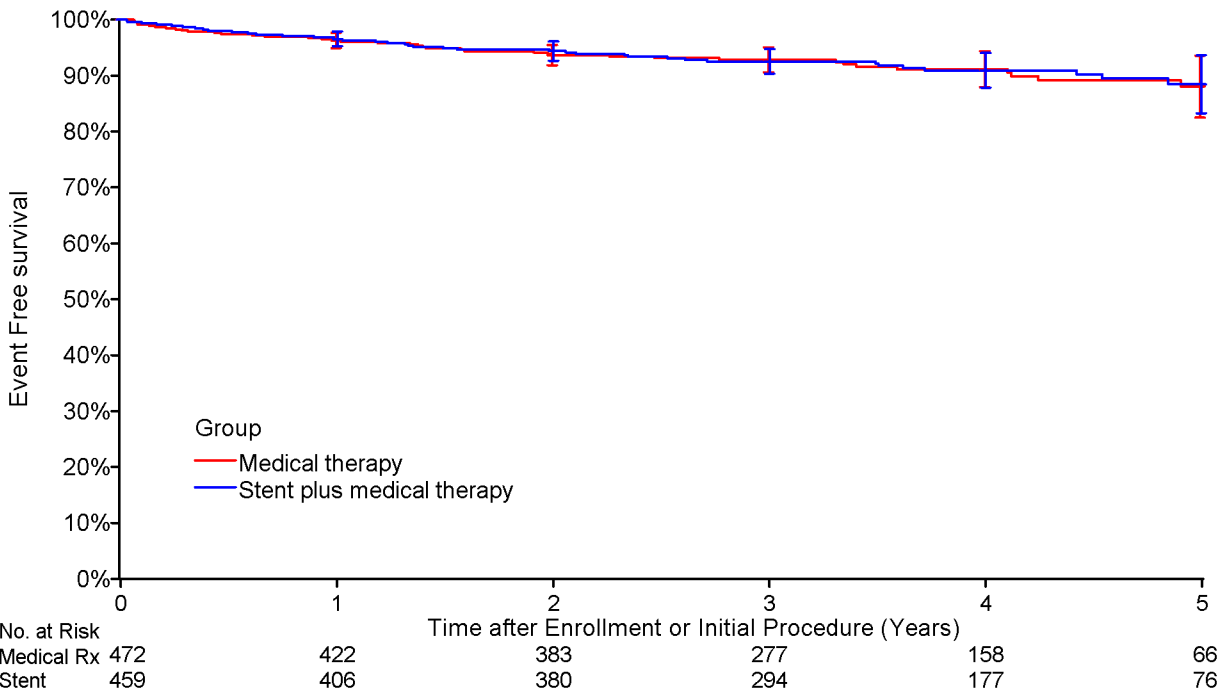

Figure S5. Survival Free from Progressive Renal Insufficiency through 5 years of follow-up

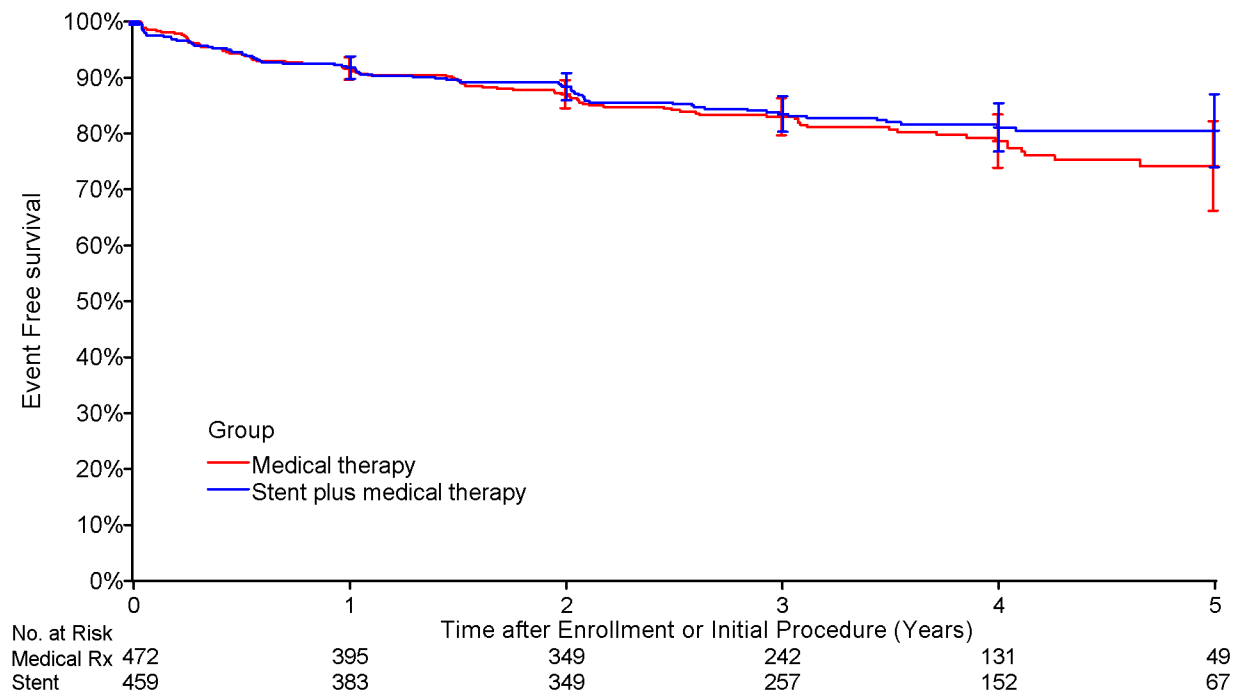



Figure S6. Survival Free from Permanent renal replacement therapy through 5 years of follow-up

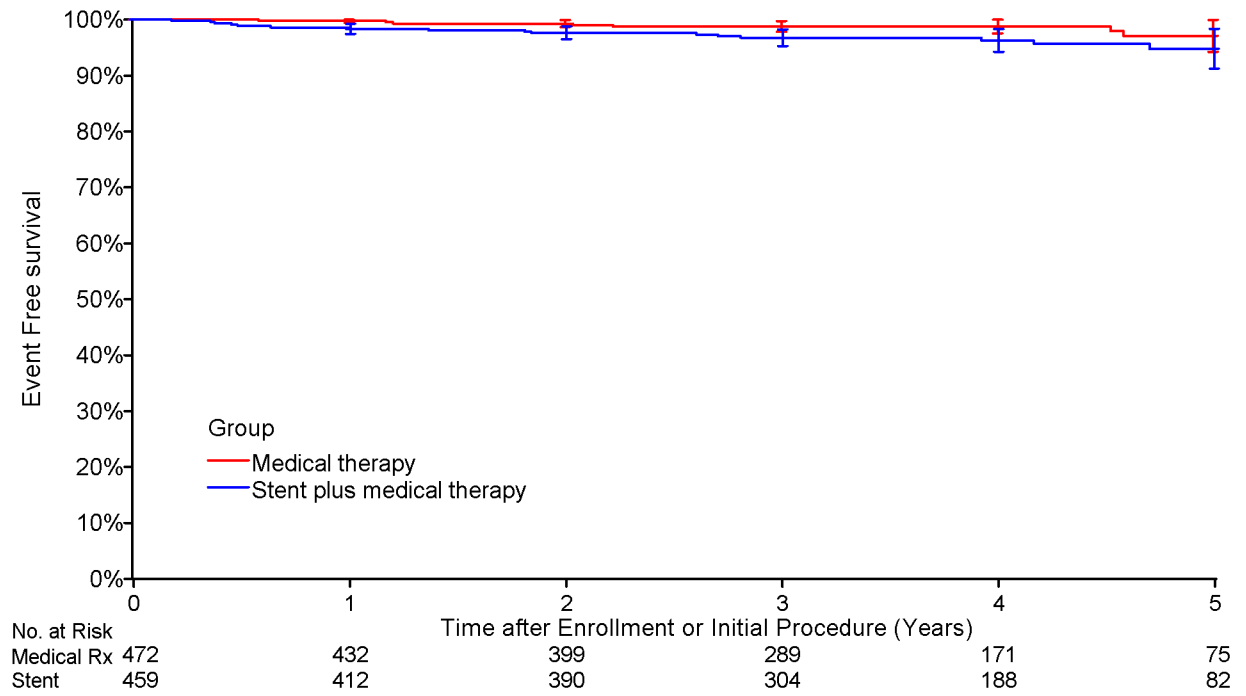

## H. Systolic blood pressure over time

Figure S7. CORAL study systolic blood pressure in mmHg.

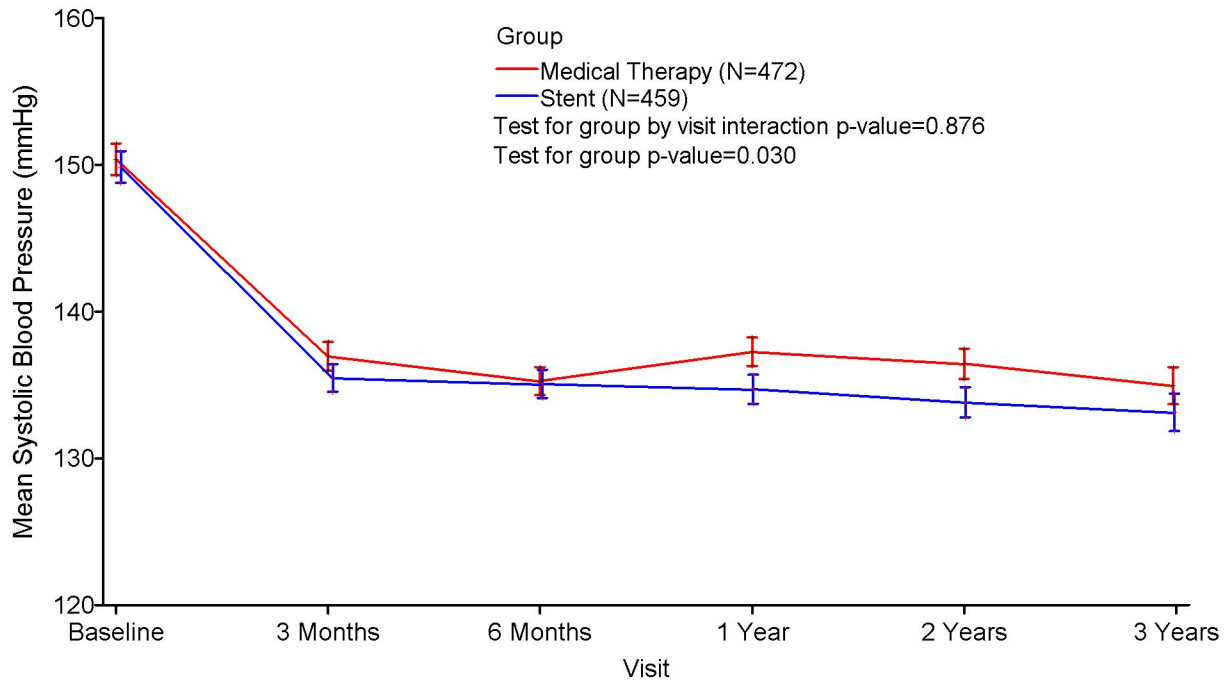

I. Table S1. Changes in Clinical End Point Definitions

| Non-Fatal Event | Old CORAL Definitions                                                                                                                                                                                                                                                                                                                                                                                                                                                                                                                                                                                                                                                                                                                                                                                                                                                                                                                                                                                                                                                                                     | New CORAL Definitions                                                                                                                                                                                                                                                                                                                                                                                                                                                                                                                                                                                                                                                                                                                                                                                                                                                                                                                                                                                                                                                                                                                                                                                                                                                                                                                                                                                                                                                                                   |
|-----------------|-----------------------------------------------------------------------------------------------------------------------------------------------------------------------------------------------------------------------------------------------------------------------------------------------------------------------------------------------------------------------------------------------------------------------------------------------------------------------------------------------------------------------------------------------------------------------------------------------------------------------------------------------------------------------------------------------------------------------------------------------------------------------------------------------------------------------------------------------------------------------------------------------------------------------------------------------------------------------------------------------------------------------------------------------------------------------------------------------------------|---------------------------------------------------------------------------------------------------------------------------------------------------------------------------------------------------------------------------------------------------------------------------------------------------------------------------------------------------------------------------------------------------------------------------------------------------------------------------------------------------------------------------------------------------------------------------------------------------------------------------------------------------------------------------------------------------------------------------------------------------------------------------------------------------------------------------------------------------------------------------------------------------------------------------------------------------------------------------------------------------------------------------------------------------------------------------------------------------------------------------------------------------------------------------------------------------------------------------------------------------------------------------------------------------------------------------------------------------------------------------------------------------------------------------------------------------------------------------------------------------------|
| Stroke          | <p>A focal neurological deficit (resulting from a vascular cause involving the central nervous system) of sudden onset that is not reversible within 24 hours (including death) and which is not due to a readily identifiable cause (ie brain tumor, trauma). In addition, a brain imaging study showing infarction or hemorrhage is also required to meet criteria for this event.</p> <p>Transient ischemia attacks (TIAs) are defined as a focal neurological deficit lasting &lt; 24 hours. If a brain imaging study was performed, there should be no evidence of new infarction or new hemorrhage.</p> <p>Strokes will be further classified in one of the following categories:</p> <p><i>Hemorrhagic</i>: when there is documentation of a hemorrhage.</p> <p><i>Non-hemorrhagic</i>: when there is documentation a stroke occurred but a hemorrhage was not documented or seen on exam.</p> <p><i>Unknown</i>: when there is no clinical, radiological, or other substantial evidence to document either a hemorrhagic or non-hemorrhagic stroke but a stroke is believed to have occurred.</p> | <p>1. A focal neurological deficit of central origin lasting <b>more than</b> 24 hours, with or without imaging confirmation of cerebral infarction or intracerebral hemorrhage.</p> <p><b>OR</b></p> <p>2. A focal neurological deficit of central origin lasting <b>less than</b> 24 hours with corresponding imaging evidence of cerebral infarction or intracerebral hemorrhage.</p> <p><b>OR</b></p> <p>3. A focal neurological deficit of central origin lasting <b>less than</b> 24 hours that was treated with thrombolytic therapy or directed percutaneous intervention.</p> <p><b>OR</b></p> <p>4. A non-focal encephalopathy lasting <b>more than</b> 24 hours with imaging evidence of cerebral infarction or hemorrhage adequate to account for the clinical state.</p> <p>Patients with non-focal global encephalopathy will not be considered to have stroke without support from neurological imaging.</p> <p>Stroke will be further classified as on of the following:</p> <p><i>a. Ischemic Stroke</i> – stroke with imaging suggesting ischemic changes</p> <p><i>b. Ischemic Stroke with Hemorrhagic Conversion</i> - stroke with evidence of hemorrhage on imaging, judged to be hemorrhagic transformation of a primary ischemic stroke</p> <p><i>c. Primary Intracranial Hemorrhage</i> – stroke with evidence on imaging of intracerebral hemorrhage not due to transformation of an ischemic stroke</p> <p><i>d. Unknown</i>: when imaging is unavailable or inconclusive</p> |
| MI              | Patient must have a) positive cardiac markers (see below) <b>AND either</b> b) ECG                                                                                                                                                                                                                                                                                                                                                                                                                                                                                                                                                                                                                                                                                                                                                                                                                                                                                                                                                                                                                        | Patient must have a) positive cardiac markers (see below) <b>AND either</b> b) ECG                                                                                                                                                                                                                                                                                                                                                                                                                                                                                                                                                                                                                                                                                                                                                                                                                                                                                                                                                                                                                                                                                                                                                                                                                                                                                                                                                                                                                      |

|                                 |                                                                                                                                                                                                                                                                                                                                                                     |                                                                                                                                                                                                                                                                                                                                                                                                                                         |
|---------------------------------|---------------------------------------------------------------------------------------------------------------------------------------------------------------------------------------------------------------------------------------------------------------------------------------------------------------------------------------------------------------------|-----------------------------------------------------------------------------------------------------------------------------------------------------------------------------------------------------------------------------------------------------------------------------------------------------------------------------------------------------------------------------------------------------------------------------------------|
|                                 | <p>changes consistent with infarction or ischemic symptoms.</p> <p><b>Non-Procedural:</b> troponin or CKMB<math>\geq</math>2xULN<br/> <b>PCI-MI:</b> troponin or CKMB<math>\geq</math>3xULN*<br/> <b>CABG-MI:</b> CKMB<math>\geq</math>5xULN*<br/> *within 24 hours<br/> CK can only be used in absence of CKMB and troponin data for Non-procedural and PCI-MI</p> | <p>changes consistent with infarction or ischemic symptoms.</p> <p><b>Non-Procedural:</b> troponin or CKMB<math>&gt;</math>1xULN<br/> <b>PCI-MI:</b> troponin or CKMB<math>\geq</math>3xULN*<br/> <b>CABG-MI:</b> CKMB<math>\geq</math>5xULN** and new Q waves or new wall motion abnormalities<br/> *within 48 hours **within 72 hours<br/> CK can only be used in absence of CKMB and troponin data for Non-procedural and PCI-MI</p> |
| Progressive Renal Insufficiency | <p>A doubling of serum Cr as determined by the Core Lab, on two determinations separated by <math>\geq</math> 60 days. When such increases are observed, causes other than progression of chronic renal disease will be excluded on clinical grounds.</p>                                                                                                           | <p>A 30% reduction in eGFR (from baseline or earliest available value) using MDRD formula as determined by Core lab or local labs on two determinations separated by <math>\geq</math> 60 days. When such reductions are observed, causes other than progression of chronic renal disease will be excluded on clinical grounds.</p>                                                                                                     |

**J. Table S2. Reasons for non-enrollment of screened patients as reported by investigators.**

4375 Patients screened but not enrolled. The reasons for not enrolling are listed below:

| <u>Number of Patients</u> | <u>Reason</u>                                                                         |
|---------------------------|---------------------------------------------------------------------------------------|
| 801                       | Patient refused                                                                       |
| 210                       | Physician preference                                                                  |
| 1512                      | Renal artery stenosis <60%                                                            |
| 203                       | Failed blood pressure or chronic kidney disease criteria                              |
| 146                       | Prior renal artery stent or bypass                                                    |
| 78                        | Restenosis >50% of prior renal artery stent or bypass OR renal stent in past 9-months |
| 87                        | Fibromuscular dysplasia                                                               |
| 18                        | Translesional pressure gradient <20 mmHg systolic                                     |
| 17                        | Blood Pressure >200 mmHg systolic or >120 mmHg systolic                               |
| 12                        | Reference Vessel Diameter <3.5 mm or >8.0 mm                                          |
| 10                        | Previous kidney transplant                                                            |
| 94                        | Creatinine >3.0 mg/dl                                                                 |
| 22                        | Diabetic (retinopathy/proteinuria)                                                    |
| 47                        | Kidney <7 cm                                                                          |
| 17                        | Accessory renal artery supplying <½ of the ipsilateral renal parenchyma               |
| 107                       | Major surgery or endpoint event within 30 days                                        |
| 166                       | Comorbid condition                                                                    |
| 9                         | Aneurysm of the abdominal aorta >5.0 cm                                               |
| 1116                      | Other (reason for exclusion not specified)                                            |

**K. Table S3. Stent treatment in the stent plus medical therapy group**

|                                                                                 | <b>Number (%)</b> |
|---------------------------------------------------------------------------------|-------------------|
| • Patients assigned to stent plus medical therapy                               | 467               |
| • Administratively withdrawn due to scientific misconduct                       | 8                 |
| • Number in intention to treat analysis                                         | 459               |
| ○ Stent successfully placed                                                     | 434 (94.6)        |
| ○ No attempt to place stent                                                     | 9 (1.9)           |
| ▪ Refused stent                                                                 | 1 (0.2)           |
| ▪ Too ill to undergo procedure                                                  | 1 (0.2)           |
| ▪ Lost insurance                                                                | 1 (0.2)           |
| ▪ Withdrew prior to procedure                                                   | 6 (1.3)           |
| ○ Unable to implant stent                                                       | 3 (0.9)           |
| ○ Non-invasive pathway enrollment, stenosis did not qualify                     | 13 (2.8)          |
| ▪ Stenosis <60%                                                                 | 12 (2.6)          |
| ▪ Stenosis 100% occluded                                                        | 1 (0.2)           |
| • Angiographic complications noted by Angiographic Core Lab, per vessel treated |                   |
| ○ Dissections                                                                   | 11/495 (2.2)      |
| ○ Branch vessel occlusion                                                       | 6/495 (1.2)       |
| ○ Angiographically evident distal embolization                                  | 6/495 (1.2)       |
| ○ Wire perforation                                                              | 1/495 (0.2)       |
| ○ Vessel rupture                                                                | 1/495 (0.2)       |
| ○ Pseudoaneurysm formation                                                      | 1/495 (0.2)       |
